# Supplementary material for: PTHrP Drives Pancreatic Cancer Growth and Metastasis and Reveals a New Therapeutic Vulnerability
Source: Oxford University Press journal article supplement (doi:10.1158/2159-8290.cd-20-1098), 2021-02-15
Supplement: 21598290cd201098-sup-248142_2_supp_6844036_qmw4nv.docx [file 21598290cd201098-sup-248142_2_supp_6844036_qmw4nv.docx]

**Supplemental Table 1**

P-value and log2FoldChange of differentially expressed genes in shNT versus shPthlh cells (negative value indicates enriched in shNT and positive value indicates enriched in shPthlh).
